1 **Stridulations of *Melolontha spp.* larvae open up new possibilities for species-specific pest**  
2 **monitoring in soils**

3

4 *Authors:* Carolyn-Monika Görres<sup>1,2</sup> & David Chesmore<sup>3</sup>

5 <sup>1</sup>Department of Applied Ecology, Hochschule Geisenheim University, Geisenheim, Germany,  
6 e-mail: [carolyn.goerres@hs-gm.de](mailto:carolyn.goerres@hs-gm.de)

7 <sup>2</sup>Department of Soil Science and Plant Nutrition, Hochschule Geisenheim University,  
8 Geisenheim, Germany

9 <sup>3</sup>Department of Electronic Engineering, The University of York, York, United Kingdom, e-  
10 mail: [david.chesmore@york.ac.uk](mailto:david.chesmore@york.ac.uk)

11

12 *Corresponding author:* Carolyn-Monika Görres, Hochschule Geisenheim University,  
13 Department of Applied Ecology, Von-Lade-Str. 1, 65366 Geisenheim, Germany  
14 E-mail: [carolyn.goerres@hs-gm.de](mailto:carolyn.goerres@hs-gm.de)

15

16

17

18

19

20

21 **Acknowledgements**

22 This project has received funding from the European Union's Horizon 2020 research  
23 and innovation programme under the Marie Skłodowska-Curie grant agreement No 703107.

24 We would also like to thank the following persons for access to the collection sites, help  
25 during the excavation of larvae, and ecological insights into these animals: Rainer Hurling  
26 and Sabine Weldner (Northwest German Forest Research Institute).

27 **Abstract**

28 Root-feeding Scarabaeidae larvae can pose a serious threat to agricultural and forest  
29 ecosystems, but many details of larval ecology are still unknown. We developed an acoustic  
30 data analysis method for gaining new insights into larval ecology. In a laboratory study, third  
31 instar larvae of *Melolontha melolontha* ( $n=38$ ) and *M. hippocastani* ( $n=15$ ) kept in soil-filled  
32 containers were acoustically monitored for 5 min each, resulting in the first known  
33 stridulation recordings for each species. Subsequent continuous monitoring of three *M.*  
34 *hippocastani* larvae over several hours showed that a single larva could stridulate more than  
35 70 times per hour, and stridulation rates increased drastically with increasing larval  
36 abundance. The new fractal dimension-based data analysis method automatically detected  
37 audio sections with stridulations and provided a semi-quantitative estimate of stridulation  
38 activity. It is the first data analysis method specifically targeting Scarabaeidae larvae  
39 stridulations in soils, enabling for the first time non-invasive species-specific pest monitoring.

40

41 *Keywords:* *Melolontha* spp., stridulation, Scarabaeidae, soil acoustic, fractal dimension  
42 analysis, soil pest monitoring

43

44 *Key message:*

- 45 • Root-feeding scarab beetle larvae, known as white grubs, can be serious agricultural  
46 and forest pests.
- 47 • White grub infestation monitoring is difficult due to their cryptic lifestyle, but detailed  
48 monitoring data is essential for effective pest control.
- 49 • We present the first acoustic data analysis routine targeting stridulations, using  
50 *Melolontha melolontha* and *M. hippocastani* as model organisms.
- 51 • This new method provides for the first time the basis for the development of tools for  
52 non-invasive, species-specific, and rapid white grub monitoring in soils.

## 53 **Introduction**

54           The Melolonthinae, a subfamily of the scarab beetles (Scarabaeidae), comprises 29  
55 tribes (Smith 2006) of which several pose a serious threat to agricultural and forest  
56 ecosystems all over the world (e.g. Keller and Zimmer 2005; Jackson & Klein 2006; Frew et  
57 al. 2016). The adult beetles have strong mandibles for mainly eating leaves, however serious  
58 damage to trees and agricultural crops is first and foremost caused by the soil-dwelling, root-  
59 feeding larvae, also known as white grubs (Jackson and Klein 2006). In Europe, two species  
60 of Melolonthinae which have to be considered as important pest insects are *Melolontha*  
61 *melolontha* (Common Cockchafer) and *M. hippocastani* (Forest Cockchafer) (Keller and  
62 Zimmer 2005). These two species are very similar in their biology and are not host plant  
63 specific. While *M. melolontha* can be found in more open habitats (e.g. pastures, vegetable  
64 crops, orchards, vineyards), *M. hippocastani* mainly thrives in deciduous forests (Wagenhoff  
65 et al. 2014; Sukovata et al. 2015). Currently, these two species occur as pests in Austria,  
66 Czech Republic, France, Germany, Italy, Poland and Switzerland, but the available  
67 monitoring data is incomplete (Keller and Zimmer 2005), and *Melolontha spp.* outbreaks are  
68 expected to spread again after a decline in population sizes in the middle of the last century  
69 (Kahrer et al. 2011). The reasons behind the recovery of *Melolontha spp.* populations are  
70 mainly unknown (Kahrer et al. 2011), but are of serious concern as e.g. infested forest areas  
71 become more susceptible to droughts and secondary diseases, and forest regeneration can be  
72 hindered (Immler and Bussler 2008; Wagenhoff et al. 2014; Sukovata et al. 2015).

73           Strategies to control white grub infestations of *Melolontha spp.* include mechanical  
74 (soil-covering nets, ploughing), chemical (pesticides) and biological (*Beauveria spp.*,  
75 nematodes) measures. These have been applied to various degrees of success during the past  
76 century, but until today, there is no generally applicable, environmentally friendly pest control  
77 strategy to control white grub infestations at agricultural and forest sites (Jackson and Klein  
78 2006; Woreta 2015). One of the main reasons for this are the difficulties associated with

79 monitoring these soil-dwelling insects (Johnson et al. 2007). Due to their cryptic lifestyle,  
80 white grubs can live for years unnoticed in the soil. The larvae of *M. melolontha* and *M.*  
81 *hippocastani* live three and four years, respectively, in the soil until they develop into the  
82 adult chafer. During this time, the larvae pass three different instars. They only reach pest  
83 status if the larval abundance surpasses a certain threshold (Immler and Bussler 2008; Frew et  
84 al. 2016).

85 The current standard method for monitoring larval abundances and to confirm white  
86 grub infestations is to excavate the soil. This type of monitoring is invasive, laborious and  
87 time-consuming and cannot be performed at a high temporal frequency (Johnson et al. 2007;  
88 Immler and Bussler 2008; Mankin et al. 2009). As a result, *Melolontha* spp. infestations can  
89 go unnoticed until severe damage to the vegetation becomes visible, larval abundances can be  
90 underestimated, and many details of the larval ecology are still unknown. However, a  
91 stringent monitoring and a detailed knowledge of a target species' ecology are essential for  
92 the development of environmentally friendly and successful pest control measures (Frew et al.  
93 2016).

94 One way to improve the monitoring of *Melolontha* spp. larvae is the use of acoustics.  
95 Acoustic sensors inserted into the soil have already been successfully applied for detecting  
96 white grub infestations and also for the quantification of larval abundances non-invasively  
97 (Zhang et al. 2003; Mankin et al. 2009a; Mankin et al. 2011). However, these studies were  
98 purely based on monitoring incidental sounds (movement, feeding sounds) and species  
99 identification still had to be confirmed via soil excavations. Several different species  
100 belonging to the Melolonthinae can co-occur in soils – not all of them necessarily being  
101 regarded as pest species (Jackson and Klein 2006) – and even for experts it can be difficult to  
102 differentiate the species rapidly in the field when they are still in their larval stage. Especially  
103 differentiation of *M. melolontha* and *M. hippocastani* larvae based only on morphological  
104 features alone does not seem possible (Krell 2004). One promising way to overcome this

105 problem is to shift the focus of acoustic monitoring from incidental sounds to stridulations.  
106 Stridulations are actively produced sounds for communication created by rubbing together  
107 certain body parts (Alexander and Moore 1963). Harvey et al. (2011) have shown for three  
108 different Scarabaeoidea species that the larvae produce species-specific stridulation patterns.  
109 Targeting larval stridulations has the potential to greatly improve pest monitoring by enabling  
110 non-invasive, species-specific monitoring with high spatial and temporal coverage. However  
111 thus far, stridulations have rarely been studied and never been utilized in field monitoring  
112 programs (Sprecher-Uebersax & Durrer 1998; Harvey et al. 2011). This study presents the  
113 first stridulation audio recordings of *M. melolontha* and *M. hippocastani* larvae and  
114 demonstrates their applicability for easy identification of these two species. We also designed  
115 a new data analysis routine for rapid detection and quantitative estimation of *Melolontha* spp.  
116 stridulation events in soil audio recordings based on fractal dimension. *Melolontha* spp. were  
117 chosen due to their pest status in Europe, but they also serve as model organisms for white  
118 grubs in general. The acoustic data analysis method presented here should be easily  
119 transferable to other soil-dwelling Melolonthinae and Scarabaeidae species, providing for the  
120 first time the basis for the development of tools for non-invasive, species-specific, and rapid  
121 pest monitoring in soils, but also for soil biodiversity and soil insect ecology studies in  
122 general.

123

## 124 **Material and methods**

### 125 *Cockchafer larvae for acoustic laboratory measurements*

126 Acoustic measurements were performed with scarab beetle larvae of the species  
127 *Melolontha hippocastani* (Forest cockchafer) and *M. melolontha* (Common cockchafer). Thirty  
128 *M. hippocastani* larvae (second instar) were excavated in a mixed coniferous forest on sandy  
129 soil (Hessisches Ried, Pfungstadt, Germany) in November 2015, and individually kept in small  
130 plastic containers (100 ml) with perforated lids in the laboratory in the dark at near constant

131 room temperature (~17 °C). Each container was filled with soil from the excavation site.  
132 Approximately every two weeks, carrot slices were added to the containers as food source and  
133 the soil sprayed with tap water to keep it from drying out. In the laboratory, the larvae shed  
134 their exoskeleton once passing from second to third instar in March 2016. In June 2016, 15  
135 larvae were randomly selected for acoustic monitoring in the laboratory. Seventy-five third  
136 instar larvae of *M. melolontha* were excavated in a meadow on sandy soil (Blaubeuren-Weiler,  
137 Germany) in May 2017, and transferred to the laboratory being kept in the same way as the *M.*  
138 *hippocastani* larvae. One week after excavation, 38 of these *M. melolontha* larvae were  
139 randomly selected for acoustic monitoring.

140

#### 141 *Acoustic monitoring*

142 All acoustic measurements were conducted at room temperature (~20 °C) in a plastic  
143 box (60 cm x 40 cm x 33 cm) insulated with acoustic foam to reduce background noises.  
144 Detailed instructions for replicating the acoustic sensors described in the following paragraphs  
145 can be obtained from David Chesmore. In the first experiment, each larva was acoustically  
146 monitored for 5 min by placing one plastic container at a time into the box with a low-cost  
147 sensor attached to the outside wall of the container. The sensor was self-made based on a  
148 piezoelectric transducer (amplified, gain 20). It was connected to an external battery box  
149 which in turn was plugged into the microphone input of a commercially available audio  
150 recorder (TASCAM Linear PCM Recorder DR-05 Version 2, TEAC Europe GmbH,  
151 Wiesbaden, Germany). Sounds were recorded in .wav format with an audio sampling rate of  
152 44.1 kHz. Audio recordings of *M. hippocastani* and *M. melolontha* were conducted in June  
153 2016 and June 2017, respectively. For the *M. hippocastani* recordings, the box was placed in a  
154 room with almost no background noises, whereas for the *M. melolontha* recordings, the box  
155 was placed in a laboratory with a noisy environment.

156           After the acoustic screening of the *M. hippocastani* larvae, the three most sound-  
157 producing larvae from this population were selected for a second experiment. An acoustic  
158 sensor consisting of a piezoelectric transducer encased in a water-proof, silicone sealed plastic  
159 case (length: 21 cm, width: 3 cm, thickness: 0.5 cm) was positioned upright in a glass jar  
160 (volume: 2.7 l, height: 24 cm, diameter: 10 cm). Subsequently, the glass jar was completely  
161 filled with sandy soil from the original excavation site of the larvae. In the first step of the  
162 experiment, one of the three selected *M. hippocastani* larvae was placed on top of the soil  
163 together with fresh carrot slices as food source. The larva had to burrow itself into the soil.  
164 Upon placing the larva in the glass jar, sounds were recorded continuously with the buried  
165 sensor for 12 hours. A new audio file was created every 50 min. Two weeks later, the  
166 remaining two selected *M. hippocastani* larvae were also added to the jar together with fresh  
167 carrot slices. A new continuous audio recording was started, this time lasting for 18 hours.  
168 Apart from the sensor, the audio recording equipment and the audio sampling rate were the  
169 same as in the first experiment. During the recordings, the silent box was stored in a room  
170 with little background noise.

171

## 172 *Data analysis*

173           In a first step, all audio files were bandpass filtered (200 – 5000 Hz) and normalized  
174 (maximum amplitude -1.0 dB, DC offset removed) using the software Audacity 2.1.3  
175 (Audacity Team 2017). Afterwards, stridulation events were manually detected and counted  
176 by visual and audible inspection of each audio file. In a second step, a new data analysis  
177 routine utilising fractal dimension was developed for automated rapid detection and  
178 quantitative estimation of stridulation events based on the work of Schofield (2011). The data  
179 analysis routine was written with the software R 3.4.3 (R Core Team 2017) utilizing the R  
180 packages “fractaldim\_0.8-4” (Sevcikova et al. 2014) and “tuneR\_1.3.2” (Ligges et al. 2016)

181 (see Online Resource 1). It was applied to all audio files generated in the second experiment  
182 after these files were pre-processed in Audacity as described.

183 In fractal dimension analysis, the waveform of an audio recording is considered as a  
184 geometric shape and its complexity approximated through the calculation of scalar values  
185 (Schofield and Chesmore 2008). The geometric complexity of stridulation events differs from  
186 incidental larval sounds (movement, feeding sounds) or background noise. First, the pre-  
187 processed audio files were imported into R and sliced into 2 s long sections ( $sc$ ), of which  
188 only the amplitude values were extracted for further analysis (Fig. 1a). For each  $sc$ , fractal  
189 dimensions ( $D$ ) for the waveform were calculated twice with the madogram estimator  
190 (Gneiting et al. 2010) and non-overlapping frames ( $f$ ) using a frame size of 88.2 samples (= 2  
191 ms) and 176.4 samples (= 4 ms), respectively. Subsequently for each  $f$  in  $sc$ ,  $D$  was converted  
192 into a fractal distance ( $FD$ ) by calculating its median deviation from the median ( $md$ ) (Leys et  
193 al. 2013):

194

$$195 \quad FD_f = (D_f - \text{median}(D_{sc})) / md(D_{sc})$$

196

197 The  $FD$  timeseries with a frame size of 88.2 samples consisted of 1000 samples for  
198 each  $sc$ . The  $FD$  timeseries with a frame size of 176.4 samples was linearly interpolated to  
199 comprise the same amount of samples, and then both timeseries were summed up ( $SFD$ ) (Fig.  
200 1b). The  $SFD$  timeseries was utilized for the detection and quantitative estimation of  
201 stridulations. First, the R function 'rle' (= run length encoding) was used to filter out all  $f$  with  
202  $SFD > -4.0$ . Second, all  $f$  were filtered out where  $SFD < -4.0$  for more than 2 adjacent  $f$ . Third,  
203 the time interval (in  $f$ ) between the remaining  $f$  was calculated ( $TI$ ). Clusters of single  $f$  with  
204  $SFD < -4.0$  being spaced apart less than 10  $TI$  within the clusters were indicative of  
205 stridulation events (Fig. 1c). For each 50 min audio file, stridulation activity ( $STRAC$ ) was



206 automatically estimated by multiplying  $TI$  1 to 10 with their respective frequencies and  
207 summing up the products.

208

## 209 **Results**

### 210 *Stridulation patterns*

211 Stridulations by the two species were easily recognizable when listening to the audio  
212 recordings. The common stridulations of *M. melolontha* and *M. hippocastani* consisted of  
213 short bursts of sound (Fig. 2). They were very similar and both peaked at a frequency of  
214 ~1700 Hz, however, *M. melolontha* stridulations were of longer duration than the ones of *M.*  
215 *hippocastani*. Stridulations often occurred in pairs, but repetitions up to 4 times were also  
216 recorded. A second type of stridulation which was recorded less frequently from both species  
217 consisted usually of 4 (seldom only 2 or 3) repeated patterns with a duration of ~250 ms each  
218 and a frequency peak at 3000 Hz (Fig. 3).

219

### 220 *Distribution of stridulation events*

221 During the 5 min acoustic screening of individual larvae, only few stridulations were  
222 detected. In total, only 5 stridulations from 3 different individuals were recorded from the set  
223 of 15 *M. hippocastani* larvae. Of the 38 *M. melolontha* larvae, 5 individuals were caught  
224 stridulating, producing 16 stridulations altogether. In contrast, numerous stridulations were  
225 observed during the continuous acoustic monitoring of *M. hippocastani* larvae in the second  
226 experiment (Fig. 4). The first larva which was placed in the soil-filled glass jar stridulated 75  
227 times in the first 50 min after placement. The stridulation rate dropped to 15 stridulations  $h^{-1}$   
228 over the next 4 h and subsequently, the larva almost completely stopped stridulating except  
229 for a few single stridulation events. In total, the larva produced 188 stridulations during 12 h  
230 of continuous recording. Stridulation activity drastically increased in the soil-filled glass jar  
231 after adding 2 more larvae. In the first 2.5 h alone, the 3 *M. hippocastani* larvae stridulated

232 682 times. Afterwards, the stridulation rate levelled below  $70 \text{ h}^{-1}$  with periods of  
233 high activity alternating with periods of very low activity. Over the course of 18 h of  
234 continuous recording, the 3 larvae produced 1100 stridulations.

235

#### 236 *Performance of data analysis routine*

237 For the fractal dimension analysis, the chosen  $f$  sizes of 88.2 and 176.4 samples were  
238 best suited for describing the geometric complexity of stridulation events in the time domain,  
239 and thus for detecting them in the amplitude timeseries. For stridulation events,  $FD$  became  
240 more negative in comparison to incidental sounds (movement and feeding sounds,  
241 background noise, and interferences). Summing up the two  $FD$  time series for each analysed  
242  $sc$  enhanced that effect, separating stridulations from incidental sounds even further along the  
243 y-axis. A threshold value of -4.0 was determined to be most suitable for separating  
244 stridulations from incidental sounds. Positive  $SFD$  values were associated with background  
245 noise and could be completely disregarded in any further analysis (Fig. 1b).

246 The  $SFD$  threshold value of -4.0 filtered out most of the incidental sounds, but for  
247 some of them  $SFD$  also fell below -4.0. However, the short bursts of sounds which made up  
248 one stridulation event translated into a  $SFD$  timeseries in which a cluster of peaks with  
249 individual peak widths of 1 or  $2f$  and spacing between peaks ranging from 2 to  $10f$  passed  
250 the threshold (Fig. 1b and 1c). For larval movement sounds and interferences,  $SFD$  peaks  
251 passing the threshold were usually wider than  $2f$ , and not clustered. Thus, including the  
252 second and third filter step in the data analysis routine significantly improved its capability for  
253 detecting stridulations while ignoring the majority of other sounds regardless of their origin.

254 The data analysis routine based on fractal dimension did not provide a direct count of  
255 stridulation events or of sound bursts within single stridulations in an audio recording. The  
256 combined 1288 stridulations in the second experiment were spread only over 893  $sc$  (= 30  
257 min) of the entire audio recordings. Stridulations were directly identified by the data analysis

258 routine in 379 *sc* (42 %). 274 *sc* (31 %) with stridulations contained only one *SFD* peak  
259 passing the -4.0 threshold, no *SFD* peak clusters, and 240 *sc* (27 %) with stridulations were  
260 not detected. However, there was a high degree of correlation between the automatically  
261 calculated *STRAC* and the manually counted stridulations (Fig. 5).

262

## 263 **Discussion**

264 It has long been known that Melolonthinae and other Scarabaeidae larvae possess  
265 stridulatory organs and morphological descriptions are available for many species (Wessel  
266 2006). The first description for *M. melolontha* larvae stems from 1874 (Schiödte 1874). The  
267 larval stridulatory organs in Melolonthinae are located maxilla-mandibular and consist of a  
268 pars stridens (an area with fine parallel ribs) and a plectrum (sharply confined ridge) which  
269 are moving against each other (Schiödte 1874; Wessel 2006). However, actual audio  
270 recordings of larval stridulations exist only for very few Scarabaeidae species (Sprecher-  
271 Uebersax and Durrer 1998; Mankin et al. 2009b; Harvey et al. 2011). Here, we present to our  
272 knowledge the first verified audio recordings of larval stridulations from *M. melolontha* and  
273 *M. hippocastani*. The stridulations of the two species sounded quite similar, but were still  
274 distinguishable for a trained listener. The main difference was the overall duration of the  
275 single stridulations. This might have simply been the result of size differences since third  
276 instar *M. melolontha* are significantly larger than third instar *M. hippocastani* which should  
277 also result in larger stridulatory organs and possibly longer scraping times. In that case,  
278 stridulating second instar *M. melolontha* might not be distinguishable from third instar *M.*  
279 *hippocastani* in areas where both species co-occur. However, for pest control purposes it is  
280 already of great value to have an overview of the distribution of the genus *Melolontha* in the  
281 soil. We have no stridulation recordings of soil-dwelling Scarabaeidae larvae co-occurring  
282 with *Melolontha* spp. yet, but it has already been shown for saproxylic Scarabaeidae larvae

283 that stridulations can be used for non-invasive species-specific monitoring (Harvey et al.  
284 2011).

285 Due to the general lack of studies on beetle larval stridulations, their ecological  
286 meaning is not well understood although they are mostly interpreted as a territorial defence  
287 technique, i.e. stridulating larvae signal their presence to other larvae to avoid competition for  
288 resources and to forgo cannibalism (Kocarek 2009). Cannibalism is not uncommon  
289 (Victorsson and Wikars 1996; Kocarek 2009) and is also known for *Melolontha* spp larvae.  
290 Sprecher-Uebersax and Durrer (1998) observed in a laboratory experiment that *Lucanus*  
291 *cervus* larvae stridulated much more frequently directly after they were placed in a terrarium  
292 than later on which is in line with our own observations. A likely explanation is that larvae  
293 use stridulations to orient themselves in a new environment, but stridulations diminish once  
294 the larvae have settled in their new position (Sprecher-Uebersax and Durrer 1998). Apart  
295 from this, we do not really know if there are specific times in a Scarabaeidae larval life cycle  
296 during which stridulations occur more frequently than in others, if the larvae have a diurnal or  
297 seasonal rhythm, or what their complete repertoire of sounds is. In our fast screening of  
298 larvae, we only detected very few stridulations, and thus far, only one stridulation of a *M.*  
299 *hippocastani* larva has been recorded in the field in undisturbed soil during a survey  
300 measurement (data not shown).

301 A lack of detailed knowledge on the ecology of Melolonthinae and other Scarabaeidae  
302 larvae due to their cryptic nature belowground is a general problem for efficient and  
303 environmentally friendly pest control. Filling knowledge gaps on larvae population dynamics,  
304 interactions with abiotic factors, host plant preferences, attractive trap crops as well as  
305 naturally occurring pathogens has been identified as one major direction for future research to  
306 design more efficient pest management strategies (Frew et al. 2016). Such research would  
307 benefit tremendously from the timely development of non-invasive techniques for studying  
308 Scarabaeidae larvae in the field, especially of techniques facilitating real-time continuous

309 monitoring. To date, mainly two non-invasive techniques are available for monitoring root-  
310 feeding insects in soils – X-ray microtomography and acoustic detection – of which only the  
311 latter one is directly employable in the field thus far (Johnson et al. 2007).

312         Since the 1900s, acoustic methods have been successfully applied in a number of  
313 insect management applications (Mankin et al. 2011; Mankin 2012). However, the focus has  
314 been mainly on airborne sounds or vibrational signals transmitted through plant parts.  
315 According to Mankin et al. (2011), only 10 root-infesting Scarabaeidae species had been  
316 acoustically studied thus far. Soil is a more challenging medium for acoustic studies in  
317 comparison to air and plant parts due to its heterogeneity. It attenuates sound more strongly,  
318 especially at high frequencies, and sound transmission can be affected by already slight  
319 changes in soil composition (e.g. bulk density, organic matter content, soil moisture, root and  
320 stone distribution) on a scale of a few centimetres (Mankin et al. 2000; Zhang et al. 2003;  
321 Mankin et al. 2011). A major challenge is still the correct identification of sounds and the  
322 differentiation between pest and nonpest signals (Mankin et al. 2000; Mankin and Lapointe  
323 2003; Zhang et al. 2003; Mankin et al. 2009b;). However, acoustic soil studies on  
324 Scarabaeidae larvae have only focused on incidental insect sounds (feeding, movement)  
325 which were classified by comparing their spectral profiles with reference spectral profiles  
326 (e.g. Mankin et al. 2007). We present the first data analysis routine specifically targeting  
327 Melolonthinae larval stridulations in soil. It is based on the work of Schofield (2011) who was  
328 the first to use fractal dimension analysis for the detection of larval activity sounds,  
329 specifically larval feeding bites.

330         Fractal dimension analysis focuses on the time-domain of an audio recording, which  
331 considerably reduces its computational costs in comparison to the analysis of spectrograms  
332 and facilitates real-time acoustic identification. In addition, fractal dimension analysis is  
333 amplitude independent and thus suitable for environments with low signal-to-noise ratios like  
334 soils (Schofield and Chesmore 2008; Schofield 2011). We further developed Schofield's

335 approach by combining different  $f$  sizes, changing the  $FD$  calculation, and adding a new  
336 horizontal filter component. For larval feeding bites, the  $f$  size should ideally be equal to the  
337 length of the targeted event (Schofield and Chesmore 2008). This is not feasible for  
338 *Melolontha* spp. stridulation events which are significantly longer than feeding bites and the  
339 likelihood to falsely detect background noise increases with increasing  $f$  size. Instead,  $f$  sizes  
340 were kept small to target the single pulses within stridulations. Stridulation duration also  
341 affects the  $FD$  calculation. Schofield (2011) used a classical outlier detection approach by  
342 measuring fractal dimensions within a recording as distances from the mean value in  
343 multiples of the standard deviation. Stridulations take up a much larger proportion in a  
344 recording than feeding bites, significantly affecting the standard deviation around the mean.  
345 For the implementation of a vertical stridulation detection threshold, it proved more  
346 successful a) to use the median deviation around the median as a more robust measure of  
347 dispersion, and b) to separate the  $FD$  of stridulations and background noise further along the  
348 y-axis by combining the results of two frame sizes similarly able to capture stridulation  
349 pulses. The vertical  $SFD$  detection threshold separates stridulations pulses and incidental  
350 sounds with similar geometrical complexity from any other sounds. Stridulations within this  
351 subset can then be targeted by the newly developed horizontal filter, which takes into account  
352 the distinct temporal pattern of *Melolontha* spp. stridulations.

353         The performance of the fractal dimension analysis ultimately depends on what other  
354 sounds are present in the targeted audio recording even when applying a robust measure of  
355 dispersion as filter. The geometrical complexity of incidental sounds can vary widely and  
356 overlap with the geometrical complexity of stridulations leading to false positives, whereas  
357 stridulations can be distorted during transmission through soil in a way that they are not  
358 detectable anymore with the chosen filters. As a result, the analysis routine presented here  
359 cannot provide an absolute count of stridulation activity. However, for the laboratory  
360 experiment the result of the horizontal filter could be used to calculate a stridulation estimator

361 (*STRAC*), which correlated very well with the manually counted stridulations. Furthermore,  
362 the number of stridulations clearly increased with increasing larval abundance. If such a  
363 relationship between the newly developed stridulation estimator and larval abundances can be  
364 verified in the field, it would allow non-invasive species-specific larval abundance  
365 measurements with a single acoustic sensor per monitoring plot for the first time. Previous  
366 studies using a single acoustic sensor to monitor incidental larval sounds were able to  
367 determine with high accuracy the presence or absence of Scarabaeidae infestations, but found  
368 only a weak correlation between sound rate and larval abundance (Mankin et al. 2001;  
369 Mankin et al. 2007). Zhang et al. (2003) managed to predict larval abundances based on  
370 incidental sounds by using four sensors at a recording point, but this set-up was more time-  
371 consuming to operate than a single sensor system.

372 Frew et al. (2016) advocated that for the development of improved pest management  
373 strategies for soil-dwelling Scarabaeidae larvae, it is of immediate importance to fill  
374 knowledge gaps in the ecology of these insects. Scarabaeidae larval stridulations have been  
375 neglected in soil research and our knowledge on their ecological meaning is very limited. We  
376 used *M. melolontha* and *M. hippocastani* as model organisms in the laboratory to develop the  
377 first acoustic data analysis routine specifically targeting stridulations. The fractal dimension-  
378 based method is a fast and non-compute-intensive method for pinpointing audio sections in  
379 continuous recordings in which stridulation events took place, significantly reducing the  
380 dataset for any potential further manual or automated stridulation analysis. Furthermore, it can  
381 be adjusted for detecting other acoustic events if needed by adjusting  $f$  sizes and the  
382 thresholds for the vertical and horizontal *SFD* filter. Acoustics should be more considered in  
383 studies of cryptic soil insects as the application of sensors in the field is simple, relatively  
384 cheap, and can provide non-destructive, continuous automated monitoring. Acoustic  
385 monitoring should not be restricted to incidental sounds, but also include stridulations to make

386 use of its full potential for gaining significant new insights into insect ecology and  
387 biodiversity in general, and pest monitoring in particular.

388

### 389 **Author Contribution Statement**

390 CMG and DC designed the experiment and analysed the data. DC designed and built  
391 the acoustic sensors. CMG performed the experiment, collected all data and developed the R  
392 script. CMG wrote the first manuscript draft and DC reviewed the manuscript.

393

### 394 **Conflict of Interest**

395 The authors declare that they have no conflict of interest.

396

### 397 **Ethical approval**

398 All applicable international, national, and/or institutional guidelines for the care and  
399 use of animals were followed.



## 400 **References**

- 401 Alexander RD, Moore TE (1963) The evolutionary differentiation of stridulatory signals in  
402 beetles (Insecta: Coleoptera). *Anim Behav* 11:111–115. [https://doi.org/10.1016/0003-](https://doi.org/10.1016/0003-3472(63)90018-6)  
403 [3472\(63\)90018-6](https://doi.org/10.1016/0003-3472(63)90018-6)
- 404 Audacity Team (2017) Audacity(R): Free Audio Editor and Recorder [Computer application].  
405 <https://audacityteam.org/>. Accessed 08 March 2017, Version 2.1.3.
- 406 Frew A, Barnett K, Nielsen UN, Riegler M, Johnson SN (2016) Belowground ecology of  
407 scarabs feeding on grass roots: Current knowledge and future directions for  
408 management in Australasia. *Front Plant Sci* 7:321.  
409 <https://doi.org/10.3389/fpls.2016.00321>
- 410 Gneiting T, Sevcikova H, Percival, DB (2010) Estimators of fractal dimensions: Assessing the  
411 roughness of time series and spatial data. University of Washington, Department of  
412 Statistics, Technical Report No. 577, pp. 38.
- 413 Harvey DJ, Hawes CJ, Gange AC, Finch P, Chesmore D, Farr I (2011) Development of non-  
414 invasive monitoring methods for larvae and adults of the stag beetle, *Lucanus cervus*.  
415 *Insect Conserv Divers* 4:4–14. <https://doi.org/10.1111/j.1752-4598.2009.00072.x>
- 416 Immler T, Bussler H (2008) Forest cockchafer at the Bavarian Lower Main. *Forstschutz*  
417 *Aktuell* 45:17–20.
- 418 Jackson TA, Klein MG (2006) Scarabs as pests: A continuing problem. *Coleopters Soc Monogr*  
419 5:102–119. [https://doi.org/10.1649/0010-065x\(2006\)60\[102:sapacp\]2.0.co;2](https://doi.org/10.1649/0010-065x(2006)60[102:sapacp]2.0.co;2)
- 420 Johnson SN, Crawford JW, Gregory PJ, Grinev DV, Mankin RW, Masters GJ et al. (2007)  
421 Non-invasive techniques for investigating and modelling root-feeding insects in  
422 managed and natural systems. *Agric For Entomol* 9:39–46.  
423 <https://doi.org/10.1111/j.1461-9563.2006.00315.x>
- 424 Kahrer A, Perny B, Steyrer G, Hausdorf H (2011) Cockchafers spreading quickly also in East  
425 Austria. *Forstschutz Aktuell* 53:5–10.

- 426 Keller S, Zimmermann G (2005) Scarabs and other soil pests in Europe: Situation,  
427 perspectives and control strategies. IOBC-WPRS Bull 28:9–12.
- 428 Kocarek P (2009) Sound production and chorusing behaviour in larvae of *Icosium*  
429 *tomentosum*. Cent Eur J Biol 4:422–426. <https://doi.org/10.2478/s11535-009-0040-2>
- 430 Krell F-T (2004) Identification of larvae and adults of the Central European *Melolontha*  
431 species (Coleoptera: Scarabaeoidea). Laimburg J 1:211–219.
- 432 Leys C, Ley C, Klein O, Bernard P, Licata L (2013) Detecting outliers: Do not use standard  
433 deviation around the mean, use absolute deviation around the median. J Exp Soc  
434 Psychol 49:764–766. <https://doi.org/10.1016/j.jesp.2013.03.013>
- 435 Ligges U, Krey S, Mersmann O, Schnackenberg S (2016) tuneR: Analysis of music. [http://r-](http://r-forge.r-project.org/projects/tuner/)  
436 [forge.r-project.org/projects/tuner/](http://r-forge.r-project.org/projects/tuner/). Accessed 21 August 2018.
- 437 Mankin RW (2012) Applications of acoustics in insect pest management. CAB Reviews 7:1–  
438 7. <https://doi.org/10.1079/PAVSNNR20127001>
- 439 Mankin RW, Hagstrum DW, Smith MT, Roda AL, Kairo MTK (2011) Perspective and  
440 promise: a century of insect acoustic detection and monitoring. Am Entomol 57:30–44.  
441 <https://doi.org/10.1093/ae/57.1.30>
- 442 Mankin RW, Samson PR, Chandler KJ (2009a) Acoustic detection of Melolonthine larvae in  
443 Australian sugarcane. J Econ Entomol 102:1523–1535.  
444 <https://doi.org/10.1603/029.102.0417>
- 445 Mankin RW, Moore A, Samson PR, Chandler KJ (2009b) Acoustic characteristics of dynastid  
446 beetle stridulations. Fla Entomol 92:123–133.
- 447 Mankin RW, Hubbard JL, Flanders KL (2007) Acoustic indicators for mapping infestation  
448 probabilities of soil invertebrates. J Econ Entomol 100:790–800. [https://doi.org/](https://doi.org/10.1603/0022-0493(2007)100[790:AIFMIP]2.0.CO;2)  
449 [10.1603/0022-0493\(2007\)100\[790:AIFMIP\]2.0.CO;2](https://doi.org/10.1603/0022-0493(2007)100[790:AIFMIP]2.0.CO;2)
- 450 Mankin RW, Lapointe SL (2003) Listening to the larvae: acoustic detection of *Diaprepes*  
451 *abbreviatus* (L.). Proc Fla State Hort Soc 116:304–308.

- 452 Mankin RW, Brandhorst-Hubbard J, Flanders KL, Zhang M, Crocker SL, Lapointe SL,  
453 McCoy CW, Fisher JR, Weaver DK (2000) Eavesdropping on insects hidden in soil and  
454 interior structures of plants. *J Econ Entomol* 93:1173–1182.  
455 <https://doi.org/10.1603/0022-0493-93.4.1173>
- 456 R Core Team (2017) R: A language and environment for statistical computing. R Foundation  
457 for Statistical Computing, Vienna, Austria. <https://www.R-project.org/>. Accessed 20  
458 August 2018.
- 459 Schiödte JC (1874) Note sur les organes de stridulation chez les larves des Coléoptères  
460 Lamellicornes. *Ann Soc Entomol Fr* 4:39.
- 461 Schofield J (2011) Real-time acoustic identification of invasive wood-boring beetles.  
462 Dissertation, University of York, Department of Electronics, York, UK, pp. 176.
- 463 Schofield J, Chesmore D (2008) Automated acoustic identification of beetle larvae in  
464 imported goods using time domain analysis. *J Acoust Soc Am* 123:3778.  
465 <https://doi.org/10.1121/1.2935411>
- 466 Sevcikova H, Percival D, Gneiting T (2014) fractaldim: Estimation of fractal dimensions. R  
467 package version 0.8-4. <https://CRAN.R-project.org/package=fractaldim>. Accessed 21  
468 August 2018.
- 469 Smith ABT (2006) A review of the family-group names for the superfamily Scarabaeoidea  
470 (Coleoptera) with corrections to nomenclature and a current classification. *Coleopt Soc*  
471 *Monogr* 5:144–204. [https://doi.org/10.1649/0010-](https://doi.org/10.1649/0010-065X(2006)60[144:AROTFN]2.0.CO;2)  
472 [065X\(2006\)60\[144:AROTFN\]2.0.CO;2](https://doi.org/10.1649/0010-065X(2006)60[144:AROTFN]2.0.CO;2)
- 473 Sprecher-Uebersax E, Durrer H (1998) Untersuchungen zum Stridulationsverhalten der  
474 Hirschkäfer-Larven (*Lucanus cervus* L.) (Coleoptera: Lucanidae). *Mitteilungen der*  
475 *Schweizerischen Entomologischen Gesellschaft* 71:471–479.

- 476 Sukovata L, Jaworski T, Karolewski P, Kolk A (2015) The performance of *Melolontha* grubs  
477 on the roots of various plant species. *Turk J Agric For* 39:107–116.  
478 <https://doi.org/10.3906/tar-1405-60>
- 479 Victorsson J, Wikars LO (1996) Sound production and cannibalism in larvae of the pine-  
480 sawyer beetle *Monochamus sutor* L. (Coleoptera: Cerambycidae). *Ent Tidskr* 117:29–  
481 33.
- 482 Wagenhoff E, Blum R, Delb H (2014) Spring phenology of cockchafers, *Melolontha* spp.  
483 (Coleoptera: Scarabaeidae), in forests of south-western Germany: results of a 3-year  
484 survey on adult emergence, swarming flights, and oogenesis from 2009 to 2011. *J For*  
485 *Sci* 60:154–165.
- 486 Wessel A (2006). Stridulation in the Coleoptera – an overview. In: Drosopoulos S, Claridge  
487 MF (eds) *Insect sounds and communication: Physiology, behaviour, ecology and*  
488 *evolution*. CRC Press, Taylor & Francis Group, Boca Raton, London, New York, pp.  
489 397–404.
- 490 Woreta D (2015) Control of cockchafer *Melolontha* spp. grubs – a review of methods. *Folia*  
491 *For Pol* 57:33–41. <https://doi.org/10.1515/ffp-2015-0005>
- 492 Zhang M, Crocker RL, Mankin RW, Flanders KL, Brandhorst-Hubbard JL (2003) Acoustic  
493 estimation of infestations and population densities of white grubs (Coleoptera:  
494 Scarabaeidae) in turfgrass. *J Econ Entomol* 96:1770–1779.  
495 <https://doi.org/10.1603/0022-0493-96.6.1770>

496 **Figures**

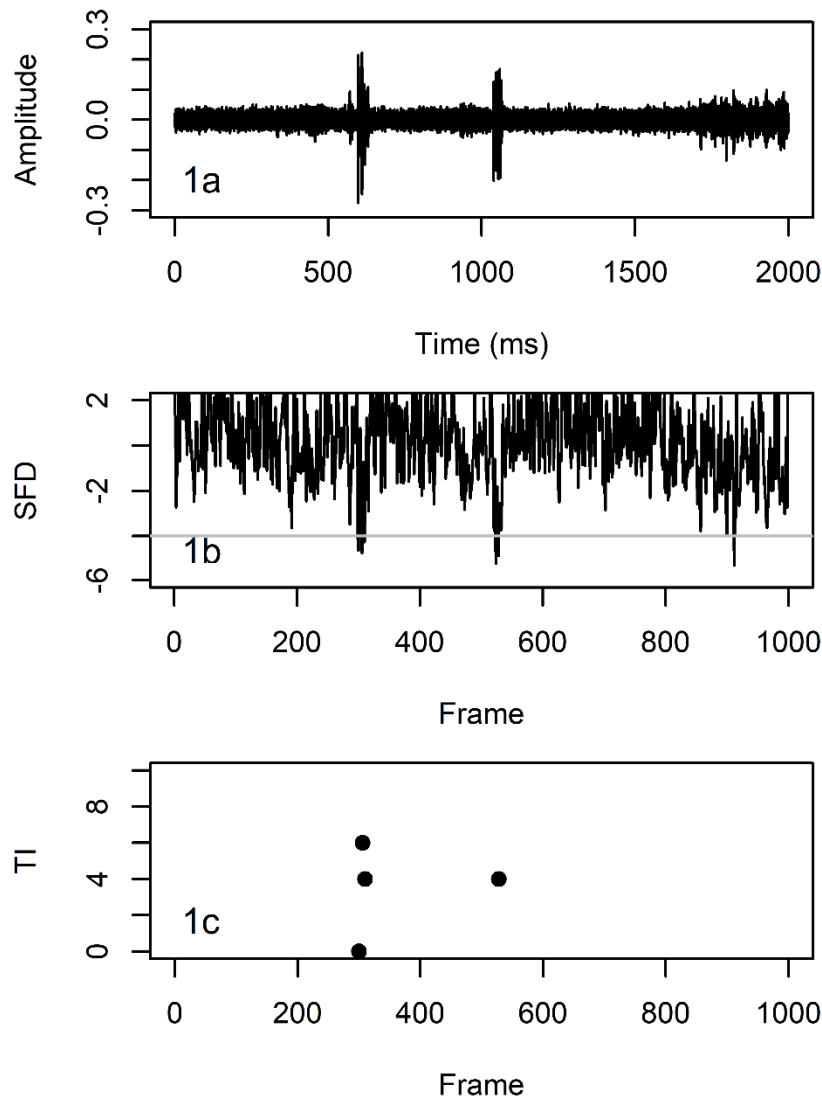

497

498 **Fig. 1** Detection of cockchafer larvae stridulations using fractal dimension analysis (see text  
499 for details). Fig. 1a: Audio recording with two stridulations (at ~650 ms and ~1100 ms) and  
500 larval moving sounds (from ~1700 ms onwards). Fig. 1b: Summed fractal distance (*SFD*) for  
501 every 2 ms (=frame) of the audio recording. Peaks crossing a threshold of -4.0 are first  
502 indicators of stridulation events. Fig. 1c: Number of frames between adjacent peaks (*TI*)  
503 crossing the threshold in Fig. 1b. A distance of less than 10 frames is indicative of a peak of  
504 clusters crossing the threshold in Fig. 1b, and thus a stridulation event

505

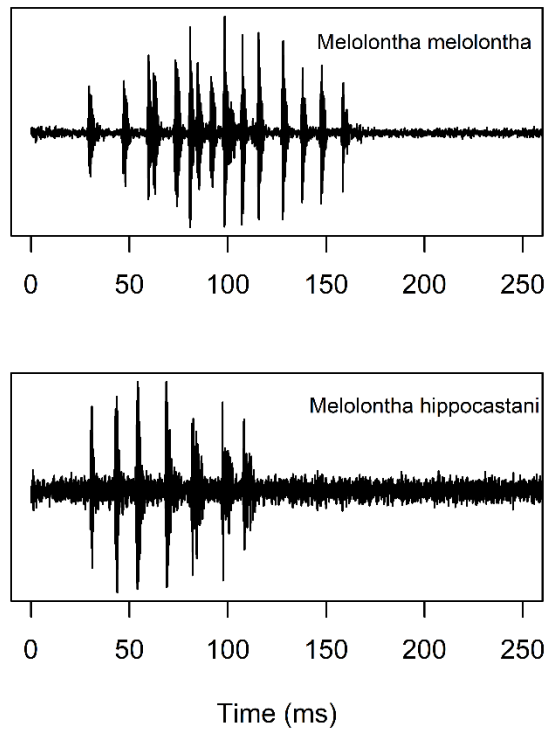

506

507 **Fig. 2** Comparison of acoustic patterns produced by stridulation of larvae (third instar) of

508 *Melolontha melolontha* and *M. hippocastani*

509

510

511

512

513

514

515

516

517

518

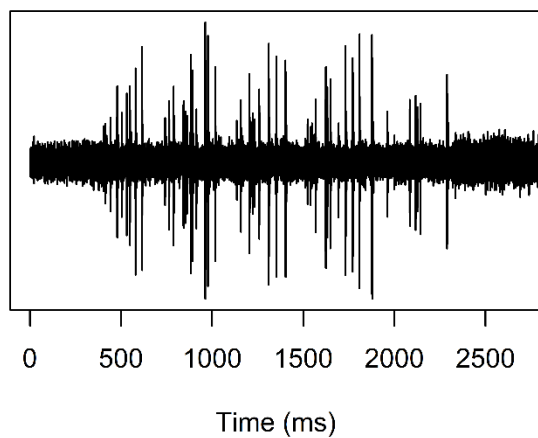

519

520 **Fig. 3** Acoustic pattern produced by stridulation of a third instar *Melolontha hippocastani*

521

522

523

524

525

526

527

528

529

530

531

532

533

534

535

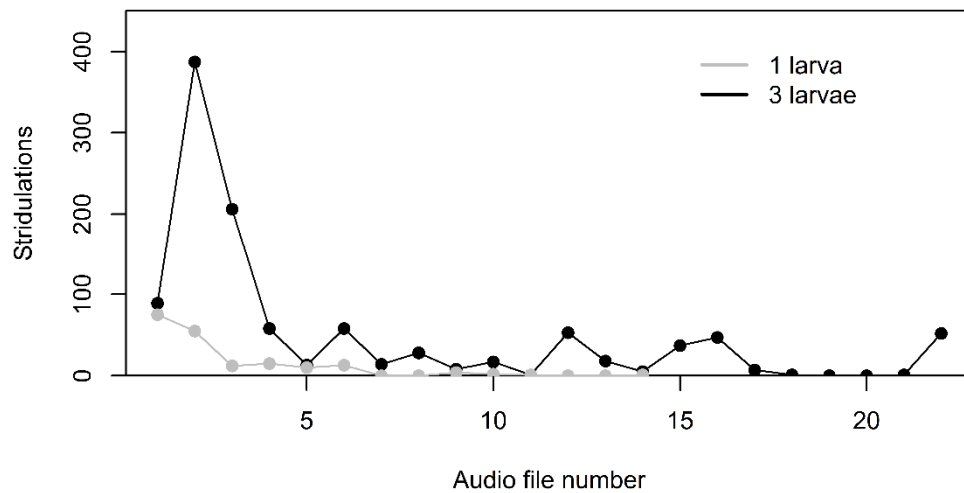

536

537 **Fig. 4** Stridulations manually counted in continuous audio recordings of third instar  
538 *Melolontha hippocastani* activities in laboratory soil incubations with 1 and 3 larvae,  
539 respectively. Each audio file was 50 min long. For the incubation with 1 larva, only 14 audio  
540 files were sequentially recorded

541

542

543

544

545

546

547

548

549

550

551

552



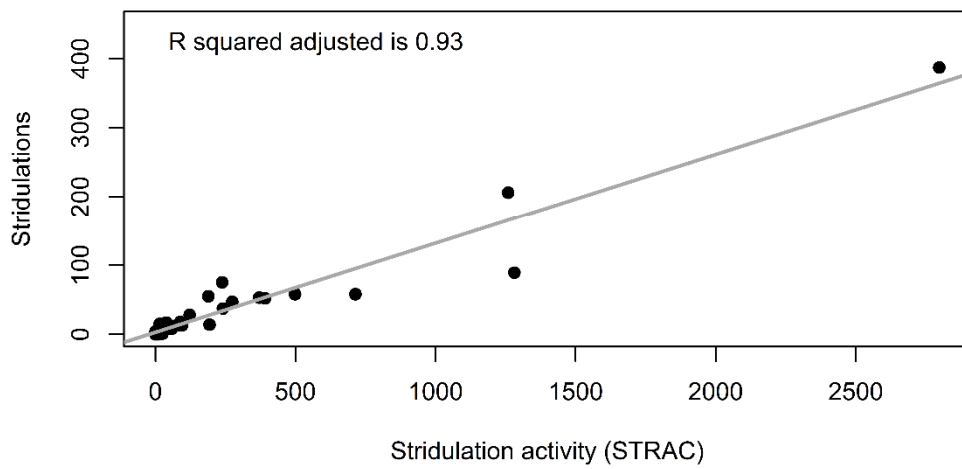

553

554 **Fig. 5** Linear regression of manually counted stridulations on automatically calculated  
555 stridulation activity (*STRAC*). Each data point came from a 50 min audio recording. The  
556 stridulation data were the same as in Fig. 4, but without differentiation between the numbers  
557 of larvae in the soil. Stridulation activity was calculated by multiplying *TI* 1 to 10 (see Fig. 1)  
558 with their respective frequencies in each 50 min audio recording and summing up the  
559 resulting products

560
